# Supplementary material
Source: PubMed Central journal article supplement (PMC2860851)

**A**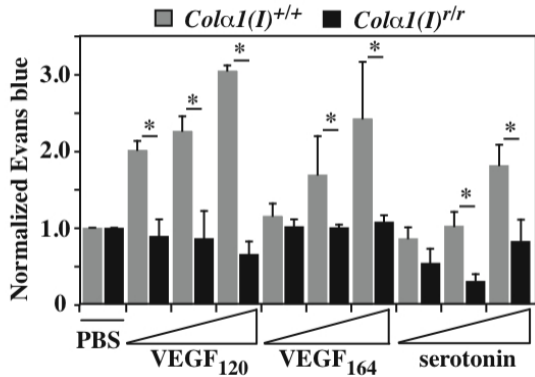**B**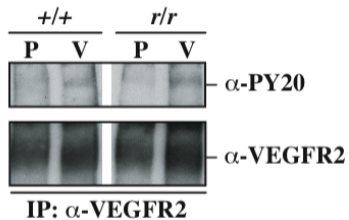

Supplement: supp_003863_DMM003863FigS1.pdf [file supp_003863_DMM003863FigS1.pdf]
